# Supplementary material
Source: PubMed Central journal article supplement (PMC6493976)
Supplement: ASN.2018060609SupplementaryData.pdf [file ASN.2018060609SupplementaryData.pdf]

# Supplemental material

---

## Table of Contents

|                                                                                                                                               |    |
|-----------------------------------------------------------------------------------------------------------------------------------------------|----|
| Table S1 : Differentially up- or downregulated proteins in IS exposed calcified versus vehicle exposed non-calcified aortic samples.....      | 2  |
| Table S2 : Differentially up- or downregulated proteins in PCS exposed calcified versus vehicle exposed non-calcified aortic samples. ....    | 9  |
| Table S3: The top 10 upregulated or downregulated proteins common to both IS and PCS exposed rat aortic samples. ....                         | 15 |
| Table S4: The top 25 of most significantly altered canonical signaling pathways in the common IS and PCS aortic proteome.....                 | 16 |
| Table S5: Differentially up- or downregulated proteins in IS exposed non-calcified versus vehicle exposed non-calcified aortic samples. ....  | 17 |
| Table S6: Differentially up- or downregulated proteins in PCS exposed non-calcified versus vehicle exposed non-calcified aortic samples. .... | 21 |
| Table S7: Biochemical parameters of CKD rats exposed to vehicle, indoxyl sulfate or p-cresyl sulfate for 4 days.....                          | 26 |

**Table S1 : Differentially up- or downregulated proteins in IS exposed calcified versus vehicle exposed non-calcified aortic samples.**

| <b>Protein Description</b>                                        | <b>Gene Symbol</b> | <b>Log<sub>2</sub> iTRAQ Ratio</b> |
|-------------------------------------------------------------------|--------------------|------------------------------------|
| Globin a1                                                         | LOC103694855       | 1.537854946                        |
| Sideroflexin-3                                                    | Sfxn3              | 1.532657025                        |
| Epsilon 1 globin                                                  | Hbe1               | 1.510884441                        |
| WD repeat-containing protein 5B                                   | Wdr5b              | 1.489274026                        |
| Unc-93 homolog B1 (C. elegans)                                    | Unc93b1            | 1.451848419                        |
| TGF-beta activated kinase 1 (MAP3K7) binding protein 1            | Tab1               | 1.372491732                        |
| FAT atypical cadherin 4                                           | Fat4               | 1.32132827                         |
| Globin c2                                                         | Hba-a2             | 1.291530096                        |
| Globin a4                                                         | Hbb                | 1.277356791                        |
| Myelin protein P0                                                 | Mpz                | 1.212255504                        |
| WD repeat and HMG-box DNA binding protein 1 (Predicted)           | Wdhd1              | 1.073430575                        |
| Anion exchange protein                                            | Slc4a1             | 1.030158921                        |
| Haptoglobin                                                       | Hp                 | 1.005444277                        |
| Neurofilament medium polypeptide                                  | Nefm               | 0.994342922                        |
| Alpha globin                                                      | Hba-a3             | 0.978506139                        |
| Actinin alpha 3                                                   | Actn3              | 0.973132227                        |
| Neurofilament light polypeptide                                   | Nefl               | 0.972158491                        |
| Annexin A8                                                        | Anxa8              | 0.965831739                        |
| Solute carrier family 43 member 1                                 | Slc43a1            | 0.947746593                        |
| Ring finger protein 219                                           | Rnf219             | 0.942127968                        |
| Serine protease HTRA1                                             | Htra1              | 0.90886013                         |
| Platelet factor 4                                                 | Pf4                | 0.905152246                        |
| Ig gamma-2A chain C region                                        | Igg-2a             | 0.898287479                        |
| RCG59107, isoform CRA_a                                           | Wdr17              | 0.893374883                        |
| 40S ribosomal protein S15                                         | Rps15              | 0.892775815                        |
| Carbonic anhydrase 1                                              | Ca1                | 0.892030196                        |
| Fibrinogen gamma chain                                            | Fgg                | 0.891299291                        |
| RNA pseudouridylate synthase domain containing 2 (Predicted)      | LOC100911166       | 0.891252577                        |
| Centrosomal protein 112                                           | Cep112             | 0.888177744                        |
| Ubiquitin-conjugating enzyme E2, J1                               | Ube2j1             | 0.864271425                        |
| RNA terminal phosphate cyclase domain 1                           | Rtcd1              | 0.86054284                         |
| UDP-N-acetylglucosamine pyrophosphorylase 1                       | Uap1               | 0.860388383                        |
| ADP-ribosylation factor-like protein 8B                           | Arl8b              | 0.85939809                         |
| Exdl2 protein                                                     | Exd2               | 0.856582852                        |
| Solute carrier family 2, facilitated glucose transporter member 4 | Slc2a4             | 0.849902548                        |
| Lysyl oxidase-like 3                                              | Loxl3              | 0.835129742                        |
| Heme oxygenase 2                                                  | Hmox2              | 0.831619366                        |
| C-reactive protein                                                | Crp                | 0.823525007                        |
| Carboxylesterase 1C                                               | Ces1c              | 0.798655384                        |

|                                                                   |              |             |
|-------------------------------------------------------------------|--------------|-------------|
| Vitronectin                                                       | Vtn          | 0.796801623 |
| Cartilage oligomeric matrix protein                               | Comp         | 0.793706665 |
| Inositol-trisphosphate 3-kinase B                                 | Itpkb        | 0.791242098 |
| Alpha-2-HS-glycoprotein                                           | Ahsg         | 0.781002744 |
| Integral membrane protein 2B                                      | Itm2b        | 0.780612605 |
| Hyaluronan and proteoglycan link protein 4                        | Hapln4       | 0.77443381  |
| 60S ribosomal protein L32                                         | Rpl32        | 0.768843487 |
| Tubulin beta-3 chain                                              | Tubb3        | 0.758806118 |
| Galectin-5                                                        | Lgals5       | 0.753996614 |
| Serotransferrin                                                   | Tf           | 0.751218273 |
| cAMP-dependent protein kinase catalytic subunit beta              | Prkacb       | 0.749542931 |
| Protein S100-B                                                    | S100b        | 0.737079153 |
| Carboxylic ester hydrolase                                        | Bche         | 0.734896155 |
| Alpha-2-HS-glycoprotein                                           | Ahsg         | 0.7321129   |
| Sodium channel protein                                            | Scn7a        | 0.7321129   |
| Apolipoprotein A-I                                                | Apoa1        | 0.730685808 |
| Peripherin                                                        | Prph         | 0.729896164 |
| Ac1873                                                            | Fga          | 0.725024593 |
| Tenascin C                                                        | Tnc          | 0.721861402 |
| 40S ribosomal protein S24                                         | LOC100363469 | 0.720099153 |
| Fibronectin                                                       | Fn1          | 0.717136996 |
| Collagen alpha-1(XII) chain                                       | Col12a1      | 0.711071749 |
| Collagen type XVIII alpha 1 chain                                 | Col18a1      | 0.705171148 |
| Actin-related protein 2/3 complex subunit 1B                      | Arpc1b       | 0.705148812 |
| RCG27247                                                          | Zc3h8        | 0.704970316 |
| Gamma-aminobutyric acid type B receptor subunit 1                 | Gabbr1       | 0.694597078 |
| Serine protease inhibitor A3L                                     | Serpina3l    | 0.69395455  |
| Collagen alpha-1(II) chain                                        | Col2a1       | 0.693297047 |
| Osteopontin                                                       | Spp1         | 0.693297047 |
| Similar to RIKEN cDNA 9030624J02                                  | LOC361635    | 0.687987827 |
| Calcium/calmodulin-dependent protein kinase type II subunit delta | Camk2d       | 0.68663013  |
| Embigin                                                           | Emb          | 0.68458094  |
| Complement C1s subcomponent                                       | C1s          | 0.681486827 |
| Complement C1q tumor necrosis factor-related protein 5            | C1qtnf5      | 0.681324406 |
| Matrix Gla protein                                                | Mgp          | 0.677271809 |
| Ig gamma-2B chain C region                                        | Igh-1a       | 0.677157058 |
| Sad1 and UNC84 domain-containing 1                                | Sun1         | 0.676993688 |
| Fibrinogen beta chain                                             | Fgb          | 0.675575489 |
| Nuclear cap-binding protein subunit 1                             | Ncbp1        | 0.66965013  |
| MON2 homolog, regulator of endosome-to-Golgi-trafficking          | Mon2         | 0.664506827 |
| C-type lectin domain family 3, member B                           | Clec3b       | 0.663177059 |
| Tenascin N                                                        | Tnn          | 0.663177059 |
| Fetub protein                                                     | Fetub        | 0.661362894 |
| Aquaporin-1                                                       | Aqp1         | 0.660681224 |
| Ankyrin 1                                                         | Ank1         | 0.659942635 |

|                                                            |           |              |
|------------------------------------------------------------|-----------|--------------|
| Collagen type IV alpha 2 chain                             | Col4a2    | 0.65707686   |
| Prostacyclin synthase                                      | Ptgis     | 0.650950757  |
| RCG20461                                                   | Stum      | 0.650950757  |
| Carbonic anhydrase 2                                       | Ca2       | 0.650329931  |
| Progressive ankylosis protein homolog                      | Ankh      | 0.650235893  |
| Family with sequence similarity 49, member A               | Fam49a    | 0.650235893  |
| Serine protease inhibitor A3K                              | Serpina3k | 0.647910783  |
| Alpha-1-macroglobulin                                      | A1m       | 0.640697559  |
| Aggrecan core protein                                      | Acan      | 0.637027501  |
| Neuroplastin                                               | Nptn      | 0.636095657  |
| Lipopolysaccharide binding protein                         | Lbp       | 0.627980951  |
| EGF-containing fibulin-like extracellular matrix protein 2 | Efemp2    | 0.626182852  |
| Laminin subunit beta 1                                     | Lamb1     | 0.626182852  |
| Schlafen family member 5                                   | Slfn5     | 0.618293001  |
| Prothrombin                                                | F2        | 0.612863351  |
| Retinol-binding protein 4                                  | Rbp4      | 0.612126788  |
| RNA-binding protein with multiple-splicing                 | Rbpms     | 0.607486246  |
| Alpha-1-antiproteinase                                     | Serpina1  | 0.607486246  |
| Collagen alpha-1(I) chain                                  | Col1a1    | 0.607323824  |
| Transporter                                                | Slc6a2    | 0.607323824  |
| Protein VAC14 homolog                                      | Vac14     | 0.60205236   |
| Amine oxidase                                              | Aoc3      | 0.598742243  |
| Laminin subunit gamma 1                                    | Lamc1     | 0.594612773  |
| Pre-mRNA processing factor 8, isoform CRA_a                | Prpf8     | 0.594612773  |
| Complement C3                                              | C3        | 0.591371639  |
| Elongator complex protein 5                                | Elp5      | 0.5911228    |
| Small nuclear ribonucleoprotein U1 subunit 70              | Snrnp70   | 0.5911228    |
| Beta-hexosaminidase subunit alpha                          | Hexa      | 0.585626812  |
| Histone H1.4                                               | Hist1h1e  | 0.57961793   |
| ATP synthase mitochondrial F1 complex assembly factor 2    | Atpaf2    | 0.574571623  |
| HEAT repeat-containing 5B                                  | Heatr5b   | 0.574571623  |
| V-type proton ATPase 16 kDa proteolipid subunit            | Atp6v0c   | 0.568646812  |
| Translocon-associated protein subunit delta                | Ssr4      | 0.568646812  |
| Collagen alpha-1(XXIII) chain                              | Col23a1   | 0.563129807  |
| Eukaryotic translation initiation factor 3 subunit M       | Eif3m     | 0.563129807  |
| Wolfram syndrome 1 homolog (Human)                         | Wfs1      | 0.557591623  |
| Mast cell carboxypeptidase A (Fragment)                    | Cpa3      | 0.552032098  |
| Uncharacterized protein                                    | Pkn3      | -0.557885594 |
| SLAIN motif family, member 2                               | Slain2    | -0.557885594 |
| ATP synthase mitochondrial F1 complex assembly factor 2    | Atpaf2    | -0.557885594 |
| Trafficking protein particle complex 6B                    | Trappc6b  | -0.569958426 |
| Myl9 protein                                               | Myl9      | -0.57743147  |
| PDZ and LIM domain protein 5                               | Pdlim5    | -0.57743147  |
| Histone H2A                                                | H2afx     | -0.58213314  |
| Neurabin-2                                                 | Ppp1r9b   | -0.58213314  |

|                                                                                |          |              |
|--------------------------------------------------------------------------------|----------|--------------|
| Tropomyosin 1, alpha, isoform CRA_p                                            | Tpm1     | -0.589815195 |
| Dimethylaniline monooxygenase [N-oxide-forming] 1                              | Fmo1     | -0.59441147  |
| Adenylate kinase 2, mitochondrial                                              | Ak2      | -0.59620957  |
| 10 kDa heat shock protein, mitochondrial                                       | Hspe1    | -0.59620957  |
| RCG34610, isoform CRA_c                                                        | Srsf1    | -0.59620957  |
| Serine/arginine-rich splicing factor 2                                         | Srsf2    | -0.598640754 |
| Adenosylhomocysteinase 2                                                       | Ahcy1    | -0.602306139 |
| Coiled-coil domain-containing 88C                                              | Ccdc88c  | -0.606795195 |
| Syntaxin 16                                                                    | Stx16    | -0.606795195 |
| Propionyl coenzyme A carboxylase, beta polypeptide                             | Pccb     | -0.60952907  |
| RNA-binding protein 3                                                          | Rbm3     | -0.60952907  |
| SP100 nuclear antigen                                                          | Sp100    | -0.60952907  |
| Alpha-1B-glycoprotein                                                          | A1bg     | -0.610856346 |
| Uncharacterized protein                                                        | Cep192   | -0.610856346 |
| 60S ribosomal protein L3                                                       | Rpl3     | -0.610856346 |
| 40S ribosomal protein S9                                                       | Rps9     | -0.610856346 |
| Alpha-crystallin B chain                                                       | Cryab    | -0.614906176 |
| Glutathione S-transferase Mu 2                                                 | Gstm2    | -0.614906176 |
| PDZ and LIM domain 3, isoform CRA_a                                            | Pdlim3   | -0.614906176 |
| Xin actin-binding repeat-containing 1                                          | Xirp1    | -0.616255564 |
| Four and a half LIM domains protein 2                                          | Fhl2     | -0.619286139 |
| Ectonucleotide pyrophosphatase/phosphodiesterase family member 3               | Enpp3    | -0.620500188 |
| Protein tyrosine kinase 9-like (A6-related protein) (Predicted), isoform CRA_b | Twf2     | -0.620500188 |
| Charged multivesicular body protein 1A                                         | Chmp1a   | -0.624985169 |
| Eukaryotic translation initiation factor 5                                     | Eif5     | -0.62506638  |
| Long-chain-fatty-acid--CoA ligase 1                                            | Acs1     | -0.625653348 |
| 2,4-dienoyl CoA reductase 1, mitochondrial, isoform CRA_a                      | Decr1    | -0.625653348 |
| Golgi associated, gamma adaptin ear containing, ARF binding protein 1          | Gga1     | -0.625653348 |
| Perilipin                                                                      | Plin1    | -0.625653348 |
| Peptidyl-prolyl cis-trans isomerase                                            | Fkbp4    | -0.627617227 |
| Methionine sulfoxide reductase B3                                              | Msrb3    | -0.627617227 |
| Synaptopodin 2                                                                 | Synpo2   | -0.627617227 |
| Transforming growth factor beta-1-induced transcript 1 protein                 | Tgfb1i1  | -0.627617227 |
| Transformer-2 protein homolog beta                                             | Tra2b    | -0.631555377 |
| Thymosin beta-4                                                                | Tmsb4x   | -0.635308379 |
| Sushi domain containing 5 (Predicted)                                          | Susd5    | -0.638579175 |
| Aminoacylase-1A                                                                | Acy1a    | -0.640441268 |
| Purkinje cell protein 4-like 1                                                 | Pcp4l1   | -0.640441268 |
| RCG35999, isoform CRA_a                                                        | Smtn     | -0.640441268 |
| Carnitine O-palmitoyltransferase 2, mitochondrial                              | Cpt2     | -0.640603689 |
| AIP1, isoform CRA_a                                                            | Dpy30    | -0.640603689 |
| Cytochrome b-c1 complex subunit 6, mitochondrial                               | Uqcrh    | -0.640603689 |
| Histone cluster 1 H1 family member c                                           | Hist1h1c | -0.641663904 |
| Serine and arginine-rich-splicing factor 4                                     | Srsf4    | -0.642695934 |
| Synaptopodin 2-like                                                            | Synpo2l  | -0.65392319  |

|                                                                   |              |              |
|-------------------------------------------------------------------|--------------|--------------|
| Methylthioribose-1-phosphate isomerase                            | Mri1         | -0.655583621 |
| Histone H3                                                        | Hist2h3c2    | -0.655710581 |
| Creatine kinase S-type, mitochondrial                             | Ckmt2        | -0.657421268 |
| Glutathione S-transferase alpha-3                                 | Gsta3        | -0.657421268 |
| High mobility group nucleosomal binding domain 2                  | LOC100360316 | -0.657421268 |
| 40S ribosomal protein S5                                          | Rps5         | -0.657421268 |
| Calreticulin                                                      | Calr         | -0.664371297 |
| Zyxin                                                             | Zyx          | -0.667802311 |
| Asporin                                                           | Aspn         | -0.670360323 |
| Complement factor D                                               | Cfd          | -0.670977338 |
| Protein phosphatase 1, regulatory subunit 12C                     | Ppp1r12c     | -0.671539871 |
| Myosin regulatory light chain RLC-A                               | Rlc-a        | -0.674355805 |
| Heme oxygenase 1                                                  | Hmox1        | -0.676643266 |
| Protein S100-A6                                                   | S100a6       | -0.676643266 |
| RCS domain containing 1 (Predicted), isoform CRA_a                | Rcsd1        | -0.679073595 |
| Crk-like protein                                                  | Crkl         | -0.679611865 |
| Putative uncharacterized protein                                  | Srsf3        | -0.684099269 |
| LIM and cysteine-rich domains 1                                   | Lmcd1        | -0.688138905 |
| Plectin                                                           | Plec         | -0.696591865 |
| Heterogeneous nuclear ribonucleoprotein U-like 1                  | Hnrnpul1     | -0.699726879 |
| Calumenin                                                         | Calu         | -0.699726879 |
| ABRA C-terminal-like                                              | Abrac1       | -0.702004234 |
| Protein AMBP                                                      | Ambp         | -0.702004234 |
| CD163 antigen (Predicted)                                         | Cd163        | -0.702004234 |
| Isocitrate dehydrogenase [NAD] subunit, mitochondrial             | Idh3a        | -0.702004234 |
| Tropomyosin beta chain                                            | Tpm2         | -0.705096969 |
| Cysteine-rich protein 1                                           | Crip1        | -0.709888688 |
| Myelin protein P0                                                 | Mpz          | -0.709888688 |
| Protocadherin 7                                                   | Pcdh7        | -0.711408684 |
| Calponin-3                                                        | Cnn3         | -0.712330232 |
| 60S acidic ribosomal protein P1                                   | Rplp1        | -0.712595043 |
| 60S ribosomal protein L7                                          | Rpl7         | -0.71777155  |
| Filamin binding LIM protein 1, isoform CRA_a                      | Fblim1       | -0.719875735 |
| Maleylacetoacetate isomerase                                      | Gstz1        | -0.719875735 |
| LIM and senescent cell antigen-like-containing domain protein     | Lims2        | -0.719875735 |
| Serine/arginine-rich splicing factor 5                            | Srsf5        | -0.724661259 |
| GM2 ganglioside activator                                         | Gm2a         | -0.733713093 |
| Heat shock 27kDa protein 1                                        | Hspb1        | -0.734191768 |
| Calponin-1                                                        | Cnn1         | -0.743504768 |
| SH3 domain-containing 19                                          | Sh3d19       | -0.747032594 |
| Atypical kinase COQ8A, mitochondrial                              | Coq8a        | -0.749832759 |
| Cytoglobin                                                        | Cygb         | -0.749832759 |
| D-dopachrome decarboxylase                                        | Ddt          | -0.749832759 |
| Nuclear ubiquitous casein and cyclin-dependent kinase substrate 1 | Nucks1       | -0.750024484 |
| Cysteine and glycine-rich protein 2                               | Csrp2        | -0.759318306 |

|                                                                                                |            |              |
|------------------------------------------------------------------------------------------------|------------|--------------|
| Long-chain specific acyl-CoA dehydrogenase, mitochondrial                                      | Acadl      | -0.766134571 |
| Glycerol-3-phosphate dehydrogenase [NAD(+)]                                                    | Gpd1l      | -0.766134571 |
| Uncharacterized protein                                                                        | LOC679794  | -0.766134571 |
| Serum deprivation-response protein                                                             | Sdpr       | -0.766134571 |
| Eukaryotic translation initiation factor 4E binding protein 2                                  | Eif4ebp2   | -0.77128014  |
| Destrin                                                                                        | Dstn       | -0.771589542 |
| Ring finger protein 219                                                                        | Rnf219     | -0.778275663 |
| Death-associated protein 1                                                                     | Dap        | -0.78355847  |
| Pleckstrin homology domain containing, family B (Evectins) member 2 (Predicted), isoform CRA_b | Plekhh2    | -0.78355847  |
| Ab2-292                                                                                        | Sec62      | -0.78355847  |
| Nucleolin                                                                                      | Ncl        | -0.785748098 |
| Hypothetical LOC289568                                                                         | RGD1311575 | -0.795942195 |
| Mast cell protease 1                                                                           | Mcpt1      | -0.799301435 |
| Alkaline phosphatase, tissue-nonspecific isozyme                                               | Alpl       | -0.807190882 |
| SH3 domain-binding glutamic acid-rich-like protein                                             | Sh3bgrl    | -0.808727661 |
| Hydroxyacyl-coenzyme A dehydrogenase, mitochondrial                                            | Hadh       | -0.816175254 |
| Superoxide dismutase [Cu-Zn]                                                                   | Sod1       | -0.816175254 |
| Polymerase I and transcript release factor                                                     | Ptrf       | -0.82092     |
| Prothymosin alpha                                                                              | Ptma       | -0.82313189  |
| Glutamine synthetase                                                                           | Glul       | -0.833248767 |
| Cysteine desulfurase, mitochondrial                                                            | Nfs1       | -0.833744227 |
| Non-muscle caldesmon                                                                           | Cald1      | -0.847883348 |
| Transforming growth factor beta-3                                                              | Tgfb3      | -0.859507323 |
| Vacuolar protein sorting-associated protein 29                                                 | Vps29      | -0.859507323 |
| Electron transfer flavoprotein subunit alpha, mitochondrial                                    | Etfa       | -0.868014185 |
| Legumain                                                                                       | Lgmn       | -0.868014185 |
| 3-ketoacyl-CoA thiolase, mitochondrial                                                         | Acaa2      | -0.885716187 |
| Spliceosome-associated protein CWC15 homolog                                                   | Cwc15      | -0.889202222 |
| Transgelin                                                                                     | Tagln      | -0.89484366  |
| Electron transfer flavoprotein subunit beta                                                    | Etfb       | -0.921785442 |
| Microsomal glutathione S-transferase 1                                                         | Mgst1      | -0.921785442 |
| Insulin-like growth factor binding protein 7, isoform CRA_b                                    | Igfbp7     | -0.94000155  |
| Serotransferrin                                                                                | Tf         | -0.941214234 |
| Cysteine and glycine-rich protein 1                                                            | Csrp1      | -0.942486761 |
| Serum albumin                                                                                  | Alb        | -0.95698155  |
| Mitochondrial brown fat uncoupling protein 1                                                   | Ucp1       | -0.958779649 |
| RCG61762, isoform CRA_d                                                                        | Srsf7      | -0.959419288 |
| Deoxyribonuclease                                                                              | Dnase1l1   | -0.967422663 |
| Four and a half LIM domains 1                                                                  | Fhl1       | -0.973767085 |
| IQ motif-containing with AAA domain 1                                                          | Iqca1      | -0.993852838 |
| Thyroid hormone receptor-associated protein 3                                                  | Thrap3     | -0.994629097 |
| Aconitate hydratase, mitochondrial                                                             | Aco2       | -0.996747499 |
| Carbonic anhydrase 3                                                                           | Ca3        | -1.021832694 |
| Solute carrier family 43, member 3                                                             | Slc43a3    | -1.035741631 |

|                                                                   |         |              |
|-------------------------------------------------------------------|---------|--------------|
| Glycerol-3-phosphate dehydrogenase [NAD(+)], cytoplasmic          | Gpd1    | -1.07581907  |
| Nuclear ubiquitous casein and cyclin-dependent kinase substrate 1 | Nucks1  | -1.089736758 |
| Fatty acid-binding protein, adipocyte                             | Fabp4   | -1.096283173 |
| Selenoprotein P                                                   | Selenop | -1.096283173 |
| Parathymosin                                                      | Ptms    | -1.103691924 |
| Prostaglandin E synthase 3                                        | Ptges3  | -1.177369449 |
| Disks large homolog 1                                             | Dlg1    | -1.181009649 |
| LRRN4 C-terminal-like                                             | Lrrn4cl | -1.278883758 |
| T-kininogen 1                                                     | Map1    | -1.392676176 |
| Zinc finger, DBF-type-containing 2                                | Zdbf2   | -1.657421268 |
| Family with sequence similarity 175, member B                     | Fam175b | -2.016932542 |



**Table S2 : Differentially up- or downregulated proteins in PCS exposed calcified versus vehicle exposed non-calcified aortic samples.**

| <b>Protein Description</b>                              | <b>Gene Symbol</b> | <b>Log<sub>2</sub> iTRAQ Ratio</b> |
|---------------------------------------------------------|--------------------|------------------------------------|
| Epsilon 1 globin                                        | Hbe1               | 1.826868402                        |
| Globin a1                                               | LOC103694855       | 1.770184922                        |
| WD repeat-containing protein 5B                         | Wdr5b              | 1.754727328                        |
| WD repeat and HMG-box DNA binding protein 1 (Predicted) | Wdhd1              | 1.482202653                        |
| Unc-93 homolog B1 (C. elegans)                          | Unc93b1            | 1.472397598                        |
| TGF-beta activated kinase 1 (MAP3K7) binding protein 1  | Tab1               | 1.396056038                        |
| Globin c2                                               | Hba-a2             | 1.354759037                        |
| FAT atypical cadherin 4                                 | Fat4               | 1.344333844                        |
| Sideroflexin-3                                          | Sfxn3              | 1.328169025                        |
| Globin a4                                               | Hbb                | 1.323959262                        |
| Hyaluronan and proteoglycan link protein 4              | Hapln4             | 1.187410688                        |
| Fibronectin                                             | Fn1                | 1.114977322                        |
| RT1 class Ia, locus A1                                  | RT1-A1             | 1.113881653                        |
| Uncharacterized protein                                 | Ighm               | 1.103722815                        |
| C-reactive protein                                      | Crp                | 1.102959719                        |
| Anion exchange protein                                  | Slc4a1             | 1.096718183                        |
| C-reactive protein                                      | Crp                | 1.087760847                        |
| Alpha-2-HS-glycoprotein                                 | Ahsg               | 1.083981341                        |
| Ring finger protein 219                                 | Rnf219             | 1.080277036                        |
| Protein FAM65B                                          | Fam65b             | 1.076305577                        |
| Gamma-aminobutyric acid type B receptor subunit 1       | Gabbr1             | 1.071985663                        |
| Haptoglobin                                             | Hp                 | 1.069142996                        |
| Cartilage oligomeric matrix protein                     | Comp               | 1.054320087                        |
| ADP-ribosylation factor-like protein 8B                 | Arl8b              | 1.042584746                        |
| Dipeptidyl peptidase 1                                  | Ctsc               | 1.038335273                        |
| Alpha globin                                            | Hba-a3             | 1.032695832                        |
| Fibrinogen gamma chain                                  | Fgg                | 1.026418812                        |
| Platelet factor 4                                       | Pf4                | 1.010303619                        |
| Solute carrier family 43 member 1                       | Slc43a1            | 0.995137584                        |
| Collagen alpha-1(XII) chain                             | Col12a1            | 0.985776827                        |
| Tenascin C                                              | Tnc                | 0.979793046                        |
| Ferritin heavy chain                                    | Fth1               | 0.973090159                        |
| Ig gamma-2A chain C region                              | Igg-2a             | 0.973043813                        |
| Collagen type VIII alpha 1 chain                        | Col8a1             | 0.954735429                        |
| Carbonic anhydrase 1                                    | Ca1                | 0.946076766                        |
| Centrosomal protein 112                                 | Cep112             | 0.940714414                        |
| Ubiquitin-conjugating enzyme E2, J1                     | Ube2j1             | 0.938520799                        |
| UDP-N-acetylglucosamine pyrophosphorylase 1             | Uap1               | 0.936974558                        |
| Transthyretin                                           | Ttr                | 0.923556312                        |
| Lysyl oxidase-like 3                                    | Loxl3              | 0.90634236                         |
| Apolipoprotein C-I                                      | Apoc1              | 0.899980226                        |

|                                                                   |              |             |
|-------------------------------------------------------------------|--------------|-------------|
| Serum amyloid P-component                                         | Apcs         | 0.897627847 |
| RNA pseudouridylate synthase domain containing 2 (Predicted)      | LOC100911166 | 0.896026746 |
| Annexin A8                                                        | Anxa8        | 0.895288656 |
| Carboxylesterase 1C                                               | Ces1c        | 0.883746358 |
| C4b-binding protein alpha chain                                   | C4bpa        | 0.878817998 |
| Aggrecan core protein                                             | Acan         | 0.874073054 |
| Vitronectin                                                       | Vtn          | 0.873302098 |
| Serine protease HTRA1                                             | Htra1        | 0.867721066 |
| Platelet factor 4                                                 | Pf4          | 0.866813487 |
| GMP synthase [glutamine-hydrolyzing]                              | Gmps         | 0.855917596 |
| CDP-diacylglycerol--inositol 3-phosphatidyltransferase            | Cdipt        | 0.84820263  |
| Immunity-related GTPase family M protein                          | Irgm         | 0.845178497 |
| Ac1873                                                            | Fga          | 0.833773734 |
| Alpha-1-inhibitor 3                                               | A1i3         | 0.832647816 |
| Fibrinogen beta chain                                             | Fgb          | 0.822278095 |
| Inositol-trisphosphate 3-kinase B                                 | Itpkb        | 0.816495742 |
| NADH dehydrogenase [ubiquinone] 1 alpha subcomplex subunit 11     | Ndufa11      | 0.81296545  |
| 40S ribosomal protein S15                                         | Rps15        | 0.812716424 |
| Exdl2 protein                                                     | Exd2         | 0.810690121 |
| Tenascin N                                                        | Tnn          | 0.809746555 |
| Serine protease inhibitor A3K                                     | Serpina3k    | 0.805016697 |
| Embigin                                                           | Emb          | 0.803118812 |
| V-type proton ATPase 16 kDa proteolipid subunit                   | Atp6v0c      | 0.799084558 |
| Transporter                                                       | Slc6a2       | 0.799008316 |
| RNA terminal phosphate cyclase domain 1                           | Rtcd1        | 0.798100737 |
| Fatty acid synthase                                               | Fasn         | 0.797023907 |
| Alpha-1-macroglobulin                                             | A1m          | 0.793010844 |
| Apolipoprotein A-II                                               | Apoa2        | 0.793010844 |
| Apolipoprotein A-I                                                | Apoa1        | 0.784951074 |
| C-type lectin domain family 3, member B                           | Clec3b       | 0.781306314 |
| Complement component C9                                           | C9           | 0.777852053 |
| Dehydrogenase/reductase SDR family member 4                       | Dhrs4        | 0.777852053 |
| Complement C3                                                     | C3           | 0.776846025 |
| Transportin 3                                                     | Tnpo3        | 0.77607458  |
| Matrix Gla protein                                                | Mgp          | 0.775357047 |
| RCG27247                                                          | Zc3h8        | 0.773735599 |
| Heme oxygenase 2                                                  | Hmox2        | 0.771049505 |
| Cyclin-dependent-like kinase 5                                    | Cdk5         | 0.762090351 |
| Aquaporin-1                                                       | Aqp1         | 0.761941218 |
| Osteopontin                                                       | Spp1         | 0.757398656 |
| Calcium/calmodulin-dependent protein kinase type II subunit delta | Camk2d       | 0.757315122 |
| Complement C1q tumor necrosis factor-related protein 5            | C1qtnf5      | 0.751311574 |
| Thrombospondin 1                                                  | Thbs1        | 0.747969243 |
| Sodium channel protein                                            | Scn7a        | 0.746935976 |
| Protein S100-B                                                    | S100b        | 0.736481619 |

|                                                                  |           |              |
|------------------------------------------------------------------|-----------|--------------|
| Alanyl (Membrane) aminopeptidase                                 | Anpep     | 0.735623362  |
| Retinol-binding protein 4                                        | Rbp4      | 0.728693258  |
| Actinin alpha 3                                                  | Actn3     | 0.723023325  |
| Family with sequence similarity 49, member A                     | Fam49a    | 0.720656651  |
| Ig gamma-2B chain C region                                       | Igh-1a    | 0.720656651  |
| Progressive ankylosis protein homolog                            | Ankh      | 0.718839134  |
| Serine protease inhibitor A3L                                    | Serpina3l | 0.71684439   |
| Galectin-5                                                       | Lgals5    | 0.715342852  |
| E3 ubiquitin-protein ligase                                      | Itch      | 0.714474805  |
| Lipopolysaccharide binding protein                               | Lbp       | 0.714247361  |
| Prothrombin                                                      | F2        | 0.710312273  |
| Integrin subunit alpha 2b                                        | Itga2b    | 0.710009407  |
| Uridine kinase                                                   | Uck1      | 0.709622931  |
| Integral membrane protein 2B                                     | Itm2b     | 0.708570766  |
| ATP synthase mitochondrial F1 complex assembly factor 2          | Atpaf2    | 0.706344241  |
| Ankyrin 1                                                        | Ank1      | 0.704656173  |
| Alpha-1-antiprotease                                             | Serpina1  | 0.702101008  |
| Translocon-associated protein subunit delta                      | Ssr4      | 0.699874954  |
| Small nuclear ribonucleoprotein U1 subunit 70                    | Snrnp70   | 0.693889742  |
| cAMP-dependent protein kinase catalytic subunit beta             | Prkacb    | 0.690060665  |
| Nuclear cap-binding protein subunit 1                            | Ncbp1     | 0.685128369  |
| Acetyl-coenzyme A transporter 1                                  | Slc33a1   | 0.685128369  |
| Guanine nucleotide-binding protein subunit gamma                 | Gng2      | 0.68304236   |
| Myosin-9                                                         | Myh9      | 0.680179153  |
| Ectonucleotide pyrophosphatase/phosphodiesterase family member 1 | Enpp1     | 0.670275001  |
| Fetub protein                                                    | Fetub     | 0.661099807  |
| Elongator complex protein 5                                      | Elp5      | 0.661099807  |
| RCG43880                                                         | Tktl1     | 0.637853524  |
| Collagen type IV alpha 2 chain                                   | Col4a2    | 0.63128087   |
| Thioredoxin domain containing 13                                 | Tmx4      | 0.63128087   |
| Thrombospondin 2                                                 | Thbs2     | 0.63128087   |
| GM2 ganglioside activator                                        | Gm2a      | -0.63571155  |
| Glutathione S-transferase alpha-3                                | Gsta3     | -0.63571155  |
| Mitochondrial pyruvate carrier 2                                 | Mpc2      | -0.63571155  |
| Complement factor D                                              | Cfd       | -0.651653093 |
| Carnitine O-palmitoyltransferase 2, mitochondrial                | Cpt2      | -0.651653093 |
| 2,4-dienoyl CoA reductase 1, mitochondrial, isoform CRA_a        | Decr1     | -0.651653093 |
| AIP1, isoform CRA_a                                              | Dpy30     | -0.651653093 |
| 10 kDa heat shock protein, mitochondrial                         | Hspe1     | -0.651653093 |
| Transketolase                                                    | Tkt       | -0.651653093 |
| Glutathione S-transferase Mu 2                                   | Gstm2     | -0.651653093 |
| 60S ribosomal protein L3                                         | Rpl3      | -0.651653093 |
| Adenosylhomocysteinase 2                                         | Ahcyl1    | -0.652560672 |
| Vinculin                                                         | Vcl       | -0.652560672 |
| ATP synthase subunit epsilon, mitochondrial                      | Atp5e     | -0.666366472 |

|                                                                |          |              |
|----------------------------------------------------------------|----------|--------------|
| Cysteine-rich protein 2                                        | Crip2    | -0.666366472 |
| Crk-like protein                                               | Crkl     | -0.666366472 |
| ABRA C-terminal-like                                           | Abracl   | -0.667772759 |
| Histone H1.4                                                   | Hist1h1e | -0.667772759 |
| Phosphoglucomutase 5                                           | Pgm5     | -0.680305663 |
| Alpha-1B-glycoprotein                                          | A1bg     | -0.684074571 |
| Atypical kinase COQ8A, mitochondrial                           | Coq8a    | -0.684074571 |
| Thymosin beta-4                                                | Tmsb4x   | -0.684074571 |
| Myosin light polypeptide 6                                     | Myl6     | -0.691957869 |
| Peptidyl-prolyl cis-trans isomerase                            | Fkbp4    | -0.694380848 |
| Purkinje cell protein 4-like 1                                 | Pcp4l1   | -0.694380848 |
| cGMP-inhibited 3',5'-cyclic phosphodiesterase A                | Pde3a    | -0.694380848 |
| PDZ and LIM domain 3, isoform CRA_a                            | Pdlim3   | -0.694380848 |
| Profilin-1                                                     | Pfn1     | -0.694380848 |
| Testin                                                         | Tes      | -0.694380848 |
| Plectin                                                        | Plec     | -0.697341268 |
| Protein AMBP                                                   | Ambp     | -0.700562694 |
| Perilipin                                                      | Plin1    | -0.700562694 |
| Aminoacylase-1A                                                | Acy1a    | -0.70187472  |
| Uncharacterized protein C11orf96 homolog                       | Ag2      | -0.709340578 |
| Decorin                                                        | Dcn      | -0.710280323 |
| cAMP-dependent protein kinase type II-alpha regulatory subunit | Prkar2a  | -0.710280323 |
| ATP-binding cassette sub-family B member 7, mitochondrial      | Abcb7    | -0.717549266 |
| Alpha-crystallin B chain                                       | Cryab    | -0.72295     |
| Methionine sulfoxide reductase B3                              | Msrb3    | -0.72295     |
| PDZ and LIM domain protein 7                                   | Pdlim7   | -0.72295     |
| Polymerase I and transcript release factor                     | Ptrf     | -0.72295     |
| Calnexin                                                       | Canx     | -0.729044905 |
| Charged multivesicular body protein 1A                         | Chmp1a   | -0.729044905 |
| Protocadherin 7                                                | Pcdh7    | -0.729044905 |
| Zyxin                                                          | Zyx      | -0.73179144  |
| CD163 antigen (Predicted)                                      | Cd163    | -0.734115254 |
| Mast cell carboxypeptidase A (Fragment)                        | Cpa3     | -0.734115254 |
| D-dopachrome decarboxylase                                     | Ddt      | -0.734115254 |
| Eukaryotic translation initiation factor 5                     | Eif5     | -0.734115254 |
| Glycerol-3-phosphate dehydrogenase [NAD(+)]                    | Gpd1l    | -0.734115254 |
| Serum albumin                                                  | Alb      | -0.736511865 |
| Transforming growth factor beta-1-induced transcript 1 protein | Tgfb1i1  | -0.73744957  |
| Actin-related protein 2/3 complex subunit 5-like protein       | Arpc5l   | -0.740632879 |
| Clathrin light chain B                                         | Cltb     | -0.740632879 |
| Creatine kinase S-type, mitochondrial                          | Ckmt2    | -0.749808688 |
| Death-associated protein 1                                     | Dap      | -0.749808688 |
| Cysteine-rich protein 1                                        | Crip1    | -0.751188767 |
| Synaptopodin 2                                                 | Synpo2   | -0.752096346 |
| Putative uncharacterized protein                               | Srsf3    | -0.760390424 |

|                                                                                                |              |              |
|------------------------------------------------------------------------------------------------|--------------|--------------|
| Carbonic anhydrase 3                                                                           | Ca3          | -0.763229203 |
| Ab2-292                                                                                        | Sec62        | -0.764091852 |
| Isocitrate dehydrogenase [NAD] subunit, mitochondrial                                          | Idh3a        | -0.768466758 |
| Myosin light chain kinase                                                                      | Mylk         | -0.781843689 |
| Filamin binding LIM protein 1, isoform CRA_a                                                   | Fblim1       | -0.781843689 |
| Profilin                                                                                       | Pfn2         | -0.784515538 |
| Glutamine synthetase                                                                           | Glul         | -0.785954185 |
| Uncharacterized protein                                                                        | LOC679794    | -0.785954185 |
| Eukaryotic translation initiation factor 1A                                                    | Eif1a        | -0.787938594 |
| Myosin regulatory light chain RLC-A                                                            | Rlc-a        | -0.790359493 |
| Histone H2A                                                                                    | H2afx        | -0.790450672 |
| Propionyl coenzyme A carboxylase, beta polypeptide                                             | Pccb         | -0.792243947 |
| Tropomyosin 1, alpha, isoform CRA_p                                                            | Tpm1         | -0.796950581 |
| Nucleosome assembly protein 1-like 1                                                           | Nap1l1       | -0.800011426 |
| Cytochrome b-c1 complex subunit 6, mitochondrial                                               | Uqcrh        | -0.803656187 |
| Coiled-coil domain-containing 88C                                                              | Ccdc88c      | -0.804256472 |
| Similar to RPE-spondin (Predicted)                                                             | Sbspon       | -0.804256472 |
| High mobility group nucleosomal binding domain 2                                               | LOC100360316 | -0.81218614  |
| Transforming growth factor beta-3                                                              | Tgfb3        | -0.81218614  |
| Spliceosome-associated protein CWC15 homolog                                                   | Cwc15        | -0.812217338 |
| Myl9 protein                                                                                   | Myl9         | -0.812217338 |
| Protein phosphatase 1, regulatory subunit 12C                                                  | Ppp1r12c     | -0.812217338 |
| RCG35999, isoform CRA_a                                                                        | Smtn         | -0.815591414 |
| Calreticulin                                                                                   | Calr         | -0.821578095 |
| Vacuolar protein sorting-associated protein 29                                                 | Vps29        | -0.82446447  |
| Serine/arginine-rich splicing factor 5                                                         | Srsf5        | -0.832782911 |
| Calumenin                                                                                      | Calu         | -0.836848195 |
| Electron transfer flavoprotein subunit alpha, mitochondrial                                    | Etfa         | -0.839725442 |
| Hydroxyacyl-coenzyme A dehydrogenase, mitochondrial                                            | Hadh         | -0.839725442 |
| IQ motif-containing with AAA domain 1                                                          | Iqca1        | -0.839725442 |
| Legumain                                                                                       | Lgmn         | -0.839725442 |
| Serum deprivation-response protein                                                             | Sdpr         | -0.839725442 |
| Superoxide dismutase [Cu-Zn]                                                                   | Sod1         | -0.839725442 |
| LIM and senescent cell antigen-like-containing domain protein                                  | Lims2        | -0.843244234 |
| RCS domain containing 1 (Predicted), isoform CRA_a                                             | Rcsd1        | -0.857768614 |
| Pleckstrin homology domain containing, family B (Evectins) member 2 (Predicted), isoform CRA_b | Plekhb2      | -0.861939176 |
| SP100 nuclear antigen                                                                          | Sp100        | -0.861939176 |
| Calponin-3                                                                                     | Cnn3         | -0.87373851  |
| Long-chain specific acyl-CoA dehydrogenase, mitochondrial                                      | Acadl        | -0.876719649 |
| Microsomal glutathione S-transferase 1                                                         | Mgst1        | -0.876719649 |
| 60S ribosomal protein L7                                                                       | Rpl7         | -0.876719649 |
| LIM and cysteine-rich domains 1                                                                | Lmcd1        | -0.887474268 |
| Alcohol dehydrogenase 1                                                                        | Adh1         | -0.889986346 |
| RCS domain containing 1 (Predicted), isoform CRA_a                                             | Rcsd1        | -0.891072759 |
| 3-ketoacyl-CoA thiolase, mitochondrial                                                         | Acaa2        | -0.895578676 |

|                                                                   |            |              |
|-------------------------------------------------------------------|------------|--------------|
| Electron transfer flavoprotein subunit beta                       | Etfb       | -0.895578676 |
| Mast cell protease 1                                              | Mcpt1      | -0.895578676 |
| Protein S100-A6                                                   | S100a6     | -0.900413323 |
| Cysteine desulfurase, mitochondrial                               | Nfs1       | -0.913469476 |
| Serine and arginine-rich-splicing factor 4                        | Srsf4      | -0.913469476 |
| Histone H3                                                        | Hist2h3c2  | -0.914687499 |
| Nucleolin                                                         | Ncl        | -0.920666182 |
| Trafficking protein particle complex 6B                           | Trappc6b   | -0.934840581 |
| 60S acidic ribosomal protein P1                                   | Rplp1      | -0.947360839 |
| LRRN4 C-terminal-like                                             | Lrrn4cl    | -0.953362203 |
| Hypothetical LOC289568                                            | RGD1311575 | -0.956738303 |
| Insulin-like growth factor binding protein 7, isoform CRA_b       | Igfbp7     | -0.957415254 |
| SH3 domain-binding glutamic acid-rich-like protein                | Sh3bgrl    | -0.967691299 |
| Nuclear ubiquitous casein and cyclin-dependent kinase substrate 1 | Nucks1     | -0.969205415 |
| Calponin-1                                                        | Cnn1       | -0.974488767 |
| Prothymosin alpha                                                 | Ptma       | -0.974488767 |
| Fatty acid-binding protein, adipocyte                             | Fabp4      | -0.99375907  |
| Asporin                                                           | Aspn       | -1.012843093 |
| Heat shock 27kDa protein 1                                        | Hspb1      | -1.026956187 |
| Aconitate hydratase, mitochondrial                                | Aco2       | -1.034981733 |
| Cysteine and glycine-rich protein 2                               | Csrp2      | -1.050816724 |
| Tropomyosin beta chain                                            | Tpm2       | -1.065079573 |
| Histone cluster 1 H1 family member c                              | Hist1h1c   | -1.09911207  |
| Cysteine and glycine-rich protein 1                               | Csrp1      | -1.10126382  |
| Transgelin                                                        | Tagln      | -1.107348295 |
| RCG61762, isoform CRA_d                                           | Srsf7      | -1.118878676 |
| Mitochondrial brown fat uncoupling protein 1                      | Ucp1       | -1.121138377 |
| Non-muscle caldesmon                                              | Cald1      | -1.137987499 |
| Alkaline phosphatase, tissue-nonspecific isozyme                  | Alpl       | -1.140240338 |
| Carnitine O-palmitoyltransferase 1, muscle isoform                | Cpt1b      | -1.166226266 |
| Thyroid hormone receptor-associated protein 3                     | Thrap3     | -1.166226266 |
| Destrin                                                           | Dstn       | -1.176275783 |
| Maleylacetoacetate isomerase                                      | Gstz1      | -1.176981631 |
| Solute carrier family 43, member 3                                | Slc43a3    | -1.189309879 |
| Disks large homolog 1                                             | Dlg1       | -1.196881188 |
| Selenoprotein P                                                   | Selenop    | -1.212768852 |
| Four and a half LIM domains 1                                     | Fhl1       | -1.32241207  |
| Prostaglandin E synthase 3                                        | Ptges3     | -1.32241207  |
| Parathymosin                                                      | Ptms       | -1.344438377 |
| Deoxyribonuclease                                                 | Dnase111   | -1.346019017 |
| T-kininogen 1                                                     | Map1       | -1.362146476 |
| Zinc finger, DBF-type-containing 2                                | Zdbf2      | -1.438606999 |
| Myelin basic protein                                              | Mbp        | -1.776775735 |
| Family with sequence similarity 175, member B                     | Fam175b    | -2.258687266 |

**Table S3: The top 10 upregulated or downregulated proteins common to both IS and PCS exposed rat aortic samples.**

| Protein Description                                    | Gene Symbol  | IS       | PCS      | MEAN     |
|--------------------------------------------------------|--------------|----------|----------|----------|
| Upregulated proteins                                   |              |          |          |          |
| hemoglobin subunit epsilon 1                           | Hbe1         | 1.510884 | 1.826868 | 1.668876 |
| hemoglobin subunit beta-2-like                         | LOC103694855 | 1.537855 | 1.770185 | 1.65402  |
| WD repeat domain 5B                                    | Wdr5b        | 1.489274 | 1.754727 | 1.622001 |
| unc-93 homolog B1 (C. elegans)                         | Unc93b1      | 1.451848 | 1.472398 | 1.462123 |
| sideroflexin 3                                         | Sfxn3        | 1.532657 | 1.328169 | 1.430413 |
| TGF-beta activated kinase 1 (MAP3K7) binding protein 1 | Tab1         | 1.372492 | 1.396056 | 1.384274 |
| FAT atypical cadherin 4                                | Fat4         | 1.321328 | 1.344334 | 1.332831 |
| hemoglobin subunit alpha 2                             | Hba-a2       | 1.29153  | 1.354759 | 1.323145 |
| hemoglobin subunit beta                                | Hbb          | 1.277357 | 1.323959 | 1.300658 |
| WD repeat and HMG-box DNA binding protein 1            | Wdhd1        | 1.073431 | 1.482203 | 1.277817 |
| Downregulated proteins                                 |              |          |          |          |
| abraxas 2, BRISC complex subunit                       | Fam175b      | -2.01693 | -2.25869 | -2.13781 |
| zinc finger DBF-type containing 2                      | Zdbf2        | -1.65742 | -1.43861 | -1.54801 |
| mannosidase processing 1                               | Map1         | -1.39268 | -1.36215 | -1.37741 |
| prostaglandin E synthase 3                             | Ptges3       | -1.17737 | -1.32241 | -1.24989 |
| parathyrosin                                           | Ptms         | -1.10369 | -1.34444 | -1.22407 |
| discs large MAGUK scaffold protein 1                   | Dlg1         | -1.18101 | -1.19688 | -1.18895 |
| deoxyribonuclease 1 like 1                             | Dnase111     | -0.96742 | -1.34602 | -1.15672 |
| selenoprotein P                                        | Selenop      | -1.09628 | -1.21277 | -1.15453 |
| four and a half LIM domains 1                          | Fhl1         | -0.97377 | -1.32241 | -1.14809 |
| LRRN4 C-terminal like                                  | Lrrn4cl      | -1.27888 | -0.95336 | -1.11612 |

For each protein significantly ( $p < 0.05$ ) and differentially expressed in aortic samples of IS/PCS versus vehicle exposed CKD rats, the protein description, official gene symbol and the Log<sub>2</sub> transformed iTRAQ expression ratio is depicted. The mean Log<sub>2</sub> iTRAQ expression ratio value for IS and PCS exposure is also indicated.

**Table S4: The top 25 of most significantly altered canonical signaling pathways in the common IS and PCS aortic proteome.**

| Canonical Pathways                                   | -log(p-value) | Upregulated | Downregulated | #Modulated*P | Proteins                                                                   |
|------------------------------------------------------|---------------|-------------|---------------|--------------|----------------------------------------------------------------------------|
| Acute Phase Response Signaling                       | 12.5          | 14          | 2             | 200          | FN1,AMBP,AHSG,SERPINA3,F2,FGG,HMOX2,ALB,HP,APOA1,CRP,FGB,LBP,FGA,TAB1,RBP4 |
| LXR/RXR Activation                                   | 7.26          | 6           | 4             | 72.6         | ALB,APOA1,VTN,AMBP,AHSG,LBP,FGA,A1BG,HADH,RBP4                             |
| FXR/RXR Activation                                   | 5.95          | 6           | 3             | 53.55        | ALB,APOA1,VTN,AMBP,AHSG,FETUB,FGA,A1BG,RBP4                                |
| Extrinsic Prothrombin Activation Pathway             | 5.03          | 4           | 0             | 20.12        | FGB,FGA,FGG,F2                                                             |
| Aryl Hydrocarbon Receptor Signaling                  | 3.04          | 0           | 6             | 18.24        | GSTA3,GSTM1,MGST1,TGFB3,PTGES3,HSPB1                                       |
| Intrinsic Prothrombin Activation Pathway             | 4.11          | 4           | 0             | 16.44        | FGB,FGA,FGG,F2                                                             |
| Coagulation System                                   | 3.84          | 4           | 0             | 15.36        | FGB,FGA,FGG,F2                                                             |
| Calcium Signaling                                    | 2.5           | 2           | 4             | 15           | PRKACB,MYL9,CALR,CAMK2D,Tpm1,Tpm2                                          |
| Hepatic Fibrosis / Hepatic Stellate Cell Activation  | 2.49          | 4           | 2             | 14.94        | MYL9,FN1,COL12A1,TGFB3,LBP,COL4A2                                          |
| Glucocorticoid Receptor Signaling                    | 2.12          | 3           | 4             | 14.84        | PRKACB,FKBP4,TGFB3,CD163,FGG,TAB1,PTGES3                                   |
| Glutathione-mediated Detoxification                  | 3.57          | 0           | 4             | 14.28        | GSTA3,GSTZ1,GSTM1,MGST1                                                    |
| ILK Signaling                                        | 2.37          | 2           | 4             | 14.22        | MYL9,TGFB1I1,FBLIM1,FN1,LIMS2,Actn3                                        |
| LPS/IL-1 Mediated Inhibition of RXR Function         | 2.09          | 1           | 5             | 12.54        | GSTA3,GSTM1,MGST1,CPT2,FABP4,LBP                                           |
| Actin Cytoskeleton Signaling                         | 2.04          | 4           | 2             | 12.24        | MYL9,FN1,CRKL,Actn3,LBP,F2                                                 |
| Glutathione Redox Reactions I                        | 2.77          | 0           | 3             | 8.31         | GSTZ1,GSTM1,MGST1                                                          |
| Role of Tissue Factor in Cancer                      | 1.82          | 4           | 0             | 7.28         | FGB,FGA,FGG,F2                                                             |
| TCA Cycle II (Eukaryotic)                            | 2.42          | 1           | 2             | 7.26         | ACO2,IDH3A,NAD+                                                            |
| IL-6 Signaling                                       | 1.78          | 3           | 1             | 7.12         | CRP,LBP,TAB1,HSPB1                                                         |
| Cardiac Hypertrophy Signaling                        | 1.4           | 2           | 3             | 7            | PRKACB,MYL9,TGFB3,TAB1,HSPB1                                               |
| Fatty Acid $\beta$ -oxidation I                      | 2.31          | 1           | 2             | 6.93         | HADH,ACAA2,NAD+                                                            |
| IL-12 Signaling and Production in Macrophages        | 1.55          | 2           | 2             | 6.2          | ALB,APOA1,TGFB3,RBP4                                                       |
| Superpathway of Methionine Degradation               | 1.85          | 1           | 2             | 5.55         | AHCYL1,PCCB,NAD+                                                           |
| TR/RXR Activation                                    | 1.33          | 2           | 1             | 3.99         | HP,UCP1,FGA                                                                |
| Neuroprotective Role of THOP1 in Alzheimer's Disease | 1.32          | 2           | 0             | 2.64         | PRKACB,SERPINA3                                                            |
| iNOS Signaling                                       | 1.3           | 2           | 0             | 2.6          | LBP,TAB1                                                                   |

For each signaling pathway the significance level (-log(p-value)) – generated using Fisher’s Exact T-test), the amount of significantly upregulated or downregulated proteins, the amount of modulated proteins (#Modulated\*P) and the protein IDs that populate each pathway is depicted.



**Table S5: Differentially up- or downregulated proteins in IS exposed non-calcified versus vehicle exposed non-calcified aortic samples.**

| <b>Protein Description</b>                                 | <b>Gene Symbol</b> | <b>Log<sub>2</sub> iTRAQ ratio</b> |
|------------------------------------------------------------|--------------------|------------------------------------|
| seminal vesicle secretory protein 6                        | Svs6               | 2.081                              |
| seminal vesicle secretory protein 3A                       | Svs3b              | 1.843                              |
| ring finger protein 219                                    | Rnf219             | 1.803                              |
| ubiquinol-cytochrome c reductase, complex III subunit X    | Uqcr10             | 1.781                              |
| seminal vesicle secretory protein 4                        | Svs4               | 1.747                              |
| seminal vesicle secretory protein 5                        | Svs5               | 1.642                              |
| potassium channel tetramerisation domain containing 12b    | LOC681355          | 1.594                              |
| creatine kinase, M-type                                    | Ckm                | 1.568                              |
| albumin                                                    | Alb                | 1.453                              |
| creatine kinase, M-type                                    | Ckm                | 1.444                              |
| ubiquinol-cytochrome c reductase, complex III subunit X    | Uqcr10             | 1.413                              |
| haptoglobin                                                | Hp                 | 1.354                              |
| ARP1 actin-related protein 1 homolog A, centractin alpha   | Actr1a             | 1.26                               |
| F-box protein 6                                            | Fbxo6              | 1.212                              |
| taste receptor, type 2, member 110                         | Tas2r110           | 1.168                              |
| fetuin B                                                   | Fetub              | 1.166                              |
| myelin protein zero                                        | Mpz                | 1.113                              |
| beta-2-microglobulin                                       | B2m                | 1.11                               |
| phosphoenolpyruvate carboxykinase 1                        | Pck1               | 1.109                              |
| bridging integrator 1                                      | Bin1               | 1.102                              |
| ribosomal protein L27a                                     | Rpl27a             | 1.093                              |
| ethylmalonyl-CoA decarboxylase 1                           | Echdc1             | 1.081                              |
| toll interacting protein                                   | Tollip             | 1.067                              |
| uncoupling protein 1                                       | Ucp1               | 1.059                              |
| 3-hydroxyisobutyrate dehydrogenase                         | Hibadh             | 1.057                              |
| fatty acid binding protein 4                               | Fabp4              | 1.055                              |
| cysteine rich protein 2                                    | Crip2              | 1.038                              |
| transferrin                                                | Tf                 | 1.035                              |
| tubulin polymerization promoting protein family member 3   | Tppp3              | 1.034                              |
| apolipoprotein N                                           | Apon               | 1.033                              |
| PBX homeobox interacting protein 1                         | Pbxip1             | 1.018                              |
| serpin family A member 1                                   | Serpina1           | 1.018                              |
| glyceraldehyde-3-phosphate dehydrogenase                   | Gapdh              | 1.013                              |
| C-reactive protein                                         | Crp                | 0.991                              |
| diazepam binding inhibitor, acyl-CoA binding protein       | Dbi                | 0.991                              |
| orosomuroid 1                                              | Orm1               | 0.988                              |
| myosin heavy chain 4                                       | Myh4               | 0.982                              |
| RAB8A, member RAS oncogene family                          | Rab8a              | 0.971                              |
| quiescin sulfhydryl oxidase 1                              | Qsox1              | 0.97                               |
| alcohol dehydrogenase 1C (class I), gamma polypeptide      | Adh1               | 0.957                              |
| myelin basic protein                                       | Mbp                | 0.937                              |
| eukaryotic translation initiation factor 3 subunit M       | Eif3m              | 0.935                              |
| glycerol-3-phosphate dehydrogenase 1                       | Gpd1               | 0.933                              |
| myosin light chain, phosphorylatable, fast skeletal muscle | Mylpf              | 0.921                              |
| germ cell-less homolog 1 (Drosophila)-like                 | LOC302576          | 0.92                               |

|                                                                |              |       |
|----------------------------------------------------------------|--------------|-------|
| phosphofructokinase, liver type                                | Pfkl         | 0.918 |
| Sjogren syndrome antigen B                                     | Ssb          | 0.913 |
| hemoglobin subunit beta                                        | Hbb          | 0.904 |
| protein kinase cAMP-dependent type II regulatory subunit alpha | Prkar2a      | 0.903 |
| hemopexin                                                      | Hpx          | 0.888 |
| MAP7 domain containing 1                                       | Map7d1       | 0.887 |
| mast cell protease 1                                           | Mcpt1        | 0.884 |
| hydroxyacyl-CoA dehydrogenase                                  | Hadh         | 0.876 |
| RIKEN cDNA 9530003J23 gene                                     | RGD1306474   | 0.874 |
| malic enzyme 1                                                 | Me1          | 0.874 |
| guanylate cyclase 1 soluble subunit beta                       | Gucy1b3      | 0.872 |
| alpha 2-HS glycoprotein                                        | Ahsg         | 0.87  |
| selenoprotein P                                                | Selenop      | 0.865 |
| enolase 3                                                      | Eno3         | 0.857 |
| synuclein gamma                                                | Sncg         | 0.855 |
| kininogen 2                                                    | Kng1         | 0.849 |
| acetyl-CoA carboxylase alpha                                   | Acaca        | 0.84  |
| peripherin                                                     | Prph         | 0.837 |
| arrestin domain containing 2                                   | Arrdc2       | 0.836 |
| exocyst complex component 1                                    | Exoc1        | 0.836 |
| transthyretin                                                  | Ttr          | 0.836 |
| nicalin                                                        | Ncln         | 0.825 |
| carnitine palmitoyltransferase 1B                              | Cpt1b        | 0.816 |
| glutamic--pyruvic transaminase                                 | Gpt          | 0.816 |
| ADP ribosylation factor 3                                      | Arf3         | 0.807 |
| myosin light chain 1                                           | Myl1         | 0.807 |
| EWS RNA-binding protein 1                                      | Ewsr1        | 0.806 |
| alpha-2-glycoprotein 1, zinc-binding                           | Azgp1        | 0.803 |
| fatty acid synthase                                            | Fasn         | 0.795 |
| carboxylesterase 1C                                            | Ces1c        | 0.789 |
| enolase 3                                                      | Eno3         | 0.779 |
| ATP citrate lyase                                              | Acly         | 0.773 |
| RIKEN cDNA 1300017J02 gene                                     | RGD1310507   | 0.772 |
| exonuclease 3'-5' domain containing 2                          | Exd2         | 0.771 |
| 2',3'-cyclic nucleotide 3' phosphodiesterase                   | Cnp          | 0.768 |
| acylphosphatase 1                                              | Acyp1        | 0.766 |
| myoglobin                                                      | Mb           | 0.766 |
| family with sequence similarity 213 member A                   | Fam213a      | 0.761 |
| complement C3                                                  | C3           | 0.757 |
| fascin actin-bundling protein 1                                | Fscn1        | 0.756 |
| septin 5                                                       | Sept5        | 0.756 |
| hemoglobin subunit beta-2-like                                 | LOC103694855 | 0.752 |
| neurofilament light                                            | Nefl         | 0.752 |
| C-type lectin domain family 3 member B                         | Clec3b       | 0.748 |
| hydroxysteroid dehydrogenase like 2                            | Hsd12        | 0.727 |
| TGF-beta activated kinase 1 (MAP3K7) binding protein 1         | Tab1         | 0.701 |
| phosphodiesterase 3A                                           | Pde3a        | 0.691 |
| collagen type II alpha 1 chain                                 | Col2a1       | 0.682 |
| matrix metalloproteinase 2                                     | Mmp2         | 0.681 |
| ADP ribosylation factor like GTPase 1                          | Arl1         | 0.661 |
| histone cluster 1 H2B family member o                          | Hist1h2bo    | 0.656 |
| huntingtin                                                     | Htt          | 0.656 |

|                                                                                                   |            |        |
|---------------------------------------------------------------------------------------------------|------------|--------|
| NADH:ubiquinone oxidoreductase subunit B6                                                         | Ndufb6     | 0.651  |
| tubulin beta 2B class IIb                                                                         | Tubb2b     | 0.651  |
| aminopeptidase-like 1                                                                             | Npepl1     | 0.646  |
| neurofilament, medium polypeptide                                                                 | Nefm       | 0.644  |
| arrestin beta 1                                                                                   | Arrb1      | 0.635  |
| coiled-coil domain containing 6                                                                   | Ccdc6      | 0.635  |
| exonuclease 3'-5' domain containing 2                                                             | Exd2       | 0.635  |
| mitochondrial pyruvate carrier 2                                                                  | Mpc2       | 0.635  |
| integrin subunit beta 3                                                                           | Itgb3      | 0.634  |
| tubulin, alpha 1B                                                                                 | Tuba1b     | 0.634  |
| seminal vesicle secretory protein 1                                                               | Svs1       | 0.614  |
| protein kinase AMP-activated catalytic subunit alpha 1                                            | Prkaa1     | 0.609  |
| alpha-1-microglobulin/bikunin precursor                                                           | Ambp       | -0.602 |
| olfactory receptor family 1 subfamily M member 1                                                  | Olr1121    | -0.608 |
| ribosomal protein S5                                                                              | Rps5       | -0.608 |
| elongin B                                                                                         | Elob       | -0.614 |
| ATPase H <sup>+</sup> transporting V1 subunit B2                                                  | Atp6v1b2   | -0.625 |
| structure specific recognition protein 1                                                          | Ssrp1      | -0.625 |
| mannose receptor C-type 1                                                                         | Mrc1       | -0.637 |
| UDP glucuronosyltransferase 1 family, polypeptide A7C                                             | Ugt1a7c    | -0.637 |
| ADP ribosylation factor interacting protein 1                                                     | Arfp1      | -0.646 |
| tumor protein D52                                                                                 | Tpd52      | -0.658 |
| ATPase inhibitory factor 1                                                                        | Atpif1     | -0.681 |
| SWI/SNF related, matrix associated, actin dependent regulator of chromatin, subfamily d, member 2 | Smarcd2    | -0.686 |
| lysozyme                                                                                          | Lyz2       | -0.723 |
| similar to 60S ribosomal protein L29 (P23)                                                        | RGD1563300 | -0.724 |
| keratin 1                                                                                         | Krt1       | -0.728 |
| myosin light chain 6                                                                              | Myl6       | -0.729 |
| fibrinogen like 2                                                                                 | Fgl2       | -0.733 |
| tumor protein D52 like 2                                                                          | Tpd52l2    | -0.736 |
| chromosome 14 open reading frame 93                                                               | RGD1565222 | -0.746 |
| G protein-coupled receptor 4                                                                      | Gpr4       | -0.751 |
| eukaryotic translation elongation factor 1 delta                                                  | Eef1d      | -0.755 |
| matrix Gla protein                                                                                | Mgp        | -0.755 |
| S100 calcium binding protein A6                                                                   | S100a6     | -0.755 |
| serine/arginine-rich splicing factor 5                                                            | Srsf5      | -0.755 |
| microtubule associated protein 1A                                                                 | Map1a      | -0.762 |
| kelch repeat and BTB domain containing 3                                                          | Kbtbd3     | -0.764 |
| tropomyosin 4                                                                                     | Tpm4       | -0.765 |
| cytidine monophosphate N-acetylneuraminic acid synthetase                                         | Cmas       | -0.767 |
| mitochondrial carrier 1                                                                           | Mtch1      | -0.775 |
| caldesmon 1                                                                                       | Cald1      | -0.778 |
| kininogen 2                                                                                       | Kng2       | -0.779 |
| FK506 binding protein 9                                                                           | Fkbp9      | -0.78  |
| desmin                                                                                            | Des        | -0.787 |
| acyl-CoA thioesterase 13                                                                          | Acot13     | -0.788 |
| ezrin                                                                                             | Ezr        | -0.793 |
| heat shock protein family B (small) member 1                                                      | Hspb1      | -0.801 |
| xin actin binding repeat containing 1                                                             | Xirp1      | -0.801 |
| caldesmon 1                                                                                       | Cald1      | -0.804 |
| tropomyosin 2, beta                                                                               | Tpm2       | -0.814 |

|                                                            |              |        |
|------------------------------------------------------------|--------------|--------|
| diaphanous related formin 1                                | Diaph1       | -0.815 |
| microfibril-associated glycoprotein 4-like                 | LOC102553715 | -0.829 |
| scavenger receptor class A member 5                        | Scara5       | -0.832 |
| histone cluster 2 H2A family member c                      | Hist2h2ac    | -0.835 |
| secreted phosphoprotein 2                                  | Spp2         | -0.836 |
| tropomyosin 1, alpha                                       | Tpm1         | -0.837 |
| fibronectin 1                                              | Fn1          | -0.843 |
| small nuclear ribonucleoprotein D3 polypeptide             | Snrpd3       | -0.843 |
| serine/threonine kinase 24                                 | Stk24        | -0.843 |
| procollagen C-endopeptidase enhancer                       | Pcolce       | -0.845 |
| ferritin heavy chain 1                                     | Fth1         | -0.846 |
| milk fat globule-EGF factor 8 protein                      | Mfge8        | -0.857 |
| translocase of outer mitochondrial membrane 22             | Tomm22       | -0.872 |
| ARP1 actin-related protein 1 homolog B, centractin beta    | Actr1b       | -0.884 |
| lysyl oxidase                                              | Lox          | -0.887 |
| ribosomal protein lateral stalk subunit P1                 | Rplp1        | -0.893 |
| PCI domain containing 2                                    | Pcid2        | -0.898 |
| CD38 molecule                                              | Cd38         | -0.926 |
| EGF containing fibulin like extracellular matrix protein 1 | Efemp1       | -0.934 |
| charged multivesicular body protein 5                      | Chmp5        | -0.935 |
| CD163 molecule                                             | Cd163        | -0.941 |
| alkaline phosphatase, liver/bone/kidney                    | Alpl         | -0.962 |
| transmembrane p24 trafficking protein 5                    | Tmed5        | -1     |
| CDC42 effector protein 1                                   | Cdc42ep1     | -1.018 |
| periostin                                                  | Postn        | -1.02  |
| signal sequence receptor subunit 2                         | Ssr2         | -1.03  |
| cytochrome P450 family 4 subfamily B member 1              | Cyp4b1       | -1.113 |
| platelet and endothelial cell adhesion molecule 1          | Pecam1       | -1.113 |
| keratin 5                                                  | Krt5         | -1.174 |
| keratin 10                                                 | Krt10        | -1.32  |
| glial fibrillary acidic protein                            | Gfap         | -1.35  |
| alpha-N-acetylgalactosaminidase                            | Naga         | -1.363 |
| charged multivesicular body protein 3                      | Chmp3        | -1.473 |
| LUC7 like 2, pre-mRNA splicing factor                      | Luc7l2       | -1.543 |

**Table S6: Differentially up- or downregulated proteins in PCS exposed non-calcified versus vehicle exposed non-calcified aortic samples.**

| <b>Protein Description</b>                              | <b>Gene Symbol</b> | <b>Log2 iTRAQ ratio</b> |
|---------------------------------------------------------|--------------------|-------------------------|
| taste receptor, type 2, member 110                      | Tas2r110           | 1.871                   |
| ribosomal protein L27a                                  | Rpl27a             | 1.723                   |
| ubiquinol-cytochrome c reductase, complex III subunit X | Uqcr10             | 1.628                   |
| propionyl-CoA carboxylase beta subunit                  | Pccb               | 1.612                   |
| F-box protein 6                                         | Fbxo6              | 1.465                   |
| alpha-N-acetylgalactosaminidase                         | Naga               | 1.329                   |
| 3-hydroxyisobutyrate dehydrogenase                      | Hibadh             | 1.325                   |
| potassium channel tetramerisation domain containing 12b | LOC681355          | 1.255                   |
| cytochrome P450 family 4 subfamily B member 1           | Cyp4b1             | 1.177                   |
| phosphoenolpyruvate carboxykinase 1                     | Pck1               | 1.173                   |
| KH-type splicing regulatory protein                     | Khsrp              | 1.066                   |
| bridging integrator 1                                   | Bin1               | 1.053                   |
| apolipoprotein N                                        | Apon               | 1.045                   |
| potassium channel tetramerisation domain containing 12b | LOC681355          | 1.036                   |
| fibrinogen gamma chain                                  | Fgg                | 0.991                   |
| fetuin B                                                | Fetub              | 0.978                   |
| ethylmalonyl-CoA decarboxylase 1                        | Echdc1             | 0.969                   |
| fatty acid binding protein 4                            | Fabp4              | 0.968                   |
| hemoglobin subunit beta                                 | Hbb                | 0.96                    |
| carnitine palmitoyltransferase 1B                       | Cpt1b              | 0.938                   |
| dipeptidase 1 (renal)                                   | Dpep1              | 0.919                   |
| fibrinogen alpha chain                                  | Fga                | 0.911                   |
| alpha-2-macroglobulin                                   | A2m                | 0.908                   |
| fascin actin-bundling protein 1                         | Fscn1              | 0.907                   |
| albumin                                                 | Alb                | 0.904                   |
| ubiquinol-cytochrome c reductase, complex III subunit X | Uqcr10             | 0.893                   |
| ethylmalonyl-CoA decarboxylase 1                        | Echdc1             | 0.891                   |
| MAP7 domain containing 1                                | Map7d1             | 0.88                    |
| RAB8A, member RAS oncogene family                       | Rab8a              | 0.869                   |
| carbonyl reductase 1                                    | LOC102556347       | 0.867                   |
| dipeptidase 1 (renal)                                   | Dpep1              | 0.86                    |
| histone cluster 1 H3 family member g                    | Hist2h3c2          | 0.86                    |
| C-reactive protein                                      | Crp                | 0.844                   |
| hydroxyacyl-CoA dehydrogenase                           | Hadh               | 0.839                   |
| histone cluster 1 H1 family member c                    | Hist1h1c           | 0.837                   |
| cathepsin S                                             | Ctss               | 0.836                   |
| ADP ribosylation factor 3                               | Arf3               | 0.824                   |
| alpha-1-microglobulin/bikunin precursor                 | Ambp               | 0.823                   |
| retinol binding protein 4                               | Rbp4               | 0.823                   |
| diazepam binding inhibitor, acyl-CoA binding protein    | Dbi                | 0.82                    |
| aldehyde dehydrogenase 3 family member A2               | Aldh3a2            | 0.819                   |
| glycerol-3-phosphate dehydrogenase 1                    | Gpd1               | 0.815                   |
| family with sequence similarity 213 member A            | Fam213a            | 0.812                   |
| hydroxysteroid dehydrogenase like 2                     | Hsd12              | 0.81                    |
| chromosome 14 open reading frame 93                     | RGD1565222         | 0.797                   |
| hemoglobin subunit beta                                 | Hbb                | 0.789                   |

|                                                                |              |       |
|----------------------------------------------------------------|--------------|-------|
| hemoglobin subunit beta-2-like                                 | LOC103694855 | 0.789 |
| glutamic--pyruvic transaminase                                 | Gpt          | 0.786 |
| glyceraldehyde-3-phosphate dehydrogenase                       | Gapdh        | 0.782 |
| RNA exonuclease 2                                              | Rexo2        | 0.771 |
| ribosomal protein L34                                          | Rpl34        | 0.771 |
| perilipin 1                                                    | Plin1        | 0.767 |
| periostin                                                      | Postn        | 0.762 |
| eukaryotic translation initiation factor 3 subunit M           | Eif3m        | 0.759 |
| electron transfer flavoprotein beta subunit                    | Etfb         | 0.759 |
| malate dehydrogenase 1                                         | Mdh1         | 0.749 |
| similar to 60S ribosomal protein L29 (P23)                     | RGD1563300   | 0.749 |
| serpin family A member 1                                       | Serpina1     | 0.749 |
| ATP binding cassette subfamily E member 1                      | Abce1        | 0.748 |
| acyl-CoA synthetase long-chain family member 1                 | Acs1         | 0.742 |
| microtubule associated protein 6                               | Map6         | 0.74  |
| fibrinogen beta chain                                          | Fgb          | 0.739 |
| germ cell-less homolog 1 (Drosophila)-like                     | LOC302576    | 0.739 |
| SH3 domain containing GRB2 like, endophilin B1                 | Sh3glb1      | 0.733 |
| phosphodiesterase 3A                                           | Pde3a        | 0.731 |
| apolipoprotein A1                                              | Apoa1        | 0.729 |
| apolipoprotein A2                                              | Apoa2        | 0.725 |
| 2,4-dienoyl-CoA reductase 1                                    | Decr1        | 0.725 |
| carboxylesterase 1                                             | Ces1d        | 0.72  |
| NADH:ubiquinone oxidoreductase subunit B6                      | Ndufb6       | 0.72  |
| platelet and endothelial cell adhesion molecule 1              | Pecam1       | 0.72  |
| acetyl-CoA acyltransferase 2                                   | Acaa2        | 0.716 |
| microsomal glutathione S-transferase 1                         | Mgst1        | 0.712 |
| adenylate kinase 2                                             | Ak2          | 0.71  |
| TGF-beta activated kinase 1 (MAP3K7) binding protein 1         | Tab1         | 0.71  |
| D-dopachrome tautomerase                                       | Ddt          | 0.708 |
| histone cluster 1 H2B family member o                          | Hist1h2bo    | 0.705 |
| ribosomal protein L19                                          | Rpl19        | 0.705 |
| ribosomal protein L37a                                         | Rpl37a       | 0.705 |
| ubiquinol-cytochrome c reductase complex assembly factor 1     | Uqcc1        | 0.703 |
| von Willebrand factor A domain containing 5A                   | Vwa5a        | 0.695 |
| phosphofructokinase, liver type                                | Pfkl         | 0.694 |
| aconitase 2                                                    | Aco2         | 0.692 |
| dual specificity tyrosine phosphorylation regulated kinase 4   | Dyrk4        | 0.692 |
| succinate dehydrogenase complex subunit C                      | Sdhc         | 0.692 |
| enoyl-CoA delta isomerase 1                                    | Eci1         | 0.689 |
| high mobility group nucleosome binding domain 1                | LOC100911295 | 0.678 |
| similar to Histone H1.2 (H1 VAR.1) (H1c)                       | LOC684828    | 0.678 |
| protein kinase cAMP-dependent type II regulatory subunit alpha | Prkar2a      | 0.675 |
| neurolysin                                                     | Nln          | 0.674 |
| aldo-keto reductase family 1, member C-like                    | Akr1cl       | 0.671 |
| cysteine rich protein 2                                        | Crip2        | 0.671 |
| ribosomal protein S6                                           | Rps6         | 0.664 |
| calcium/calmodulin dependent protein kinase II gamma           | Camk2g       | 0.66  |
| electron transfer flavoprotein alpha subunit                   | Etfalpha     | 0.66  |
| oxoglutarate dehydrogenase                                     | Ogdh         | 0.66  |
| apolipoprotein M                                               | Apom         | 0.657 |
| carnitine palmitoyltransferase 2                               | Cpt2         | 0.657 |

|                                                       |                |        |
|-------------------------------------------------------|----------------|--------|
| orosomuroid 1                                         | Orm1           | 0.657  |
| succinate-CoA ligase ADP-forming beta subunit         | Sucla2         | 0.657  |
| NADH:ubiquinone oxidoreductase subunit B10            | Ndufb10        | 0.653  |
| 6-phosphogluconolactonase                             | Pgls           | 0.65   |
| Parkinsonism associated deglycase                     | Park7          | 0.647  |
| ABRA C-terminal like                                  | Abrac1         | 0.645  |
| Sjogren syndrome antigen B                            | Ssb            | 0.643  |
| NADH:ubiquinone oxidoreductase core subunit S8        | Ndufs8         | 0.641  |
| charged multivesicular body protein 5                 | Chmp5          | 0.639  |
| enoyl-CoA hydratase 1                                 | Ech1           | 0.638  |
| histone cluster 1 H4 family member j                  | Hist1h4b       | 0.638  |
| inositol polyphosphate-1-phosphatase                  | Inpp1          | 0.638  |
| fat storage inducing transmembrane protein 2          | Fitm2          | 0.63   |
| glutathione S-transferase alpha 3                     | Gsta3          | 0.626  |
| ribosomal protein S24-like                            | LOC100363469   | 0.614  |
| FAU, ubiquitin like and ribosomal protein S30 fusion  | LOC100360647   | 0.606  |
| coenzyme Q8A                                          | Coq8a          | 0.602  |
| fibronectin 1                                         | Fn1            | 0.589  |
| collagen type XVIII alpha 1 chain                     | Col18a1        | 0.583  |
| signal sequence receptor subunit 4                    | Ssr4           | 0.583  |
| actinin alpha 3                                       | Actn3          | 0.579  |
| mitochondrial pyruvate carrier 2                      | Mpc2           | 0.579  |
| G protein subunit alpha 13                            | Gna13          | 0.575  |
| microtubule associated protein RP/EB family member 1  | Mapre1         | 0.572  |
| collagen type IV alpha 2 chain                        | Col4a2         | 0.564  |
| HtrA serine peptidase 1                               | Htra1          | 0.564  |
| ribosomal protein L39                                 | Rpl39          | 0.563  |
| milk fat globule-EGF factor 8 protein                 | Mfge8          | 0.545  |
| collagen type XV alpha 1 chain                        | Col15a1        | 0.537  |
| phosphotriesterase related                            | Pter           | 0.537  |
| D-dopachrome tautomerase                              | Ddt            | 0.518  |
| collagen type XII alpha 1 chain                       | Col12a1        | 0.506  |
| ryanodine receptor 2                                  | Ryr2           | 0.506  |
| farnesyl diphosphate synthase                         | Fdps           | 0.494  |
| carboxypeptidase A3                                   | Cpa3           | -0.494 |
| ezrin                                                 | Ezr            | -0.494 |
| myosin VI                                             | Myo6           | -0.502 |
| UDP glucuronosyltransferase 1 family, polypeptide A7C | Ugt1a7c        | -0.502 |
| drebrin 1                                             | Dbn1           | -0.51  |
| serine and arginine rich splicing factor 3            | Srsf3          | -0.519 |
| ubiquitin specific peptidase 9, X-linked              | Usp9x          | -0.519 |
| DnaJ heat shock protein family (Hsp40) member B11     | Dnajb11        | -0.535 |
| BCL2 associated athanogene 3                          | Bag3           | -0.543 |
| cell growth regulator with EF-hand domain 1           | Cgref1         | -0.543 |
| ectonucleoside triphosphate diphosphohydrolase 2      | Entpd2         | -0.543 |
| histidine-rich glycoprotein                           | Hrg            | -0.543 |
| sphingomyelin phosphodiesterase acid like 3B          | Smpd3b         | -0.543 |
| CSK, non-receptor tyrosine kinase                     | Csk            | -0.56  |
| protein O-glucosyltransferase 1                       | Poglut1        | -0.56  |
| collagen, type I, alpha 2                             | NEWGENE_621351 | -0.564 |
| fibrillin 1                                           | Fbn1           | -0.573 |
| mannose receptor C type 2                             | Mrc2           | -0.576 |

|                                                                                |           |        |
|--------------------------------------------------------------------------------|-----------|--------|
| cell adhesion molecule 3                                                       | Cadm3     | -0.582 |
| galactokinase 1                                                                | Galk1     | -0.593 |
| enabled homolog (Drosophila)                                                   | Enah      | -0.596 |
| tubulin beta 3 class III                                                       | Tubb3     | -0.602 |
| kelch repeat and BTB domain containing 3                                       | Kbtbd3    | -0.609 |
| proline and arginine rich end leucine rich repeat protein                      | Prelp     | -0.609 |
| galectin 1                                                                     | Lgals1    | -0.619 |
| ezrin                                                                          | Ezr       | -0.62  |
| fibromodulin                                                                   | Fmod      | -0.629 |
| oxysterol binding protein                                                      | Osbp      | -0.637 |
| cysteine and glycine rich protein 2                                            | Csrp2     | -0.638 |
| fibulin 5                                                                      | Fbln5     | -0.638 |
| translocase of outer mitochondrial membrane 22                                 | Tomm22    | -0.638 |
| ATP synthase, H <sup>+</sup> transporting, mitochondrial Fo complex subunit F6 | Atp5j     | -0.646 |
| histone cluster 1 H2A family member b                                          | Hist1h2ak | -0.646 |
| myelin basic protein                                                           | Mbp       | -0.646 |
| hippocalcin like 4                                                             | Hpcal4    | -0.654 |
| cutA divalent cation tolerance homolog                                         | Cuta      | -0.656 |
| nephroblastoma overexpressed                                                   | Nov       | -0.656 |
| sulfatase 1                                                                    | Sulf1     | -0.656 |
| olfactory receptor family 1 subfamily M member 1                               | Olr1121   | -0.665 |
| solute carrier family 20 member 2                                              | Slc20a2   | -0.666 |
| GATA binding protein 3                                                         | Gata3     | -0.674 |
| EWS RNA-binding protein 1                                                      | Ewsr1     | -0.683 |
| signal recognition particle 68                                                 | Srp68     | -0.688 |
| gamma-butyrobetaine hydroxylase 1                                              | Bbox1     | -0.692 |
| fibrinogen like 2                                                              | Fgl2      | -0.692 |
| ATPase inhibitory factor 1                                                     | Atpif1    | -0.696 |
| myosin light chain 9                                                           | Myl9      | -0.699 |
| RuvB like AAA ATPase 1                                                         | Ruvbl1    | -0.702 |
| keratin 1                                                                      | Krt1      | -0.703 |
| G protein-coupled receptor 4                                                   | Gpr4      | -0.707 |
| brain abundant, membrane attached signal protein 1                             | Basp1     | -0.709 |
| myosin light chain 6                                                           | Myl6      | -0.71  |
| pro-apoptotic WT1 regulator                                                    | Pawr      | -0.712 |
| glutathione peroxidase 3                                                       | Gpx3      | -0.714 |
| PYD and CARD domain containing                                                 | Pycard    | -0.718 |
| CD34 molecule                                                                  | Cd34      | -0.723 |
| dermatopontin                                                                  | Dpt       | -0.725 |
| CD163 molecule                                                                 | Cd163     | -0.727 |
| CD38 molecule                                                                  | Cd38      | -0.727 |
| hydroxysteroid 17-beta dehydrogenase 11                                        | Hsd17b11  | -0.728 |
| matrix Gla protein                                                             | Mgp       | -0.728 |
| desmin                                                                         | Des       | -0.742 |
| caldesmon 1                                                                    | Cald1     | -0.743 |
| eukaryotic translation initiation factor 2 subunit beta                        | Eif2s2    | -0.746 |
| elongin B                                                                      | Elob      | -0.76  |
| osteoglycin                                                                    | Ogn       | -0.766 |
| lumican                                                                        | Lum       | -0.77  |
| signal sequence receptor subunit 2                                             | Ssr2      | -0.778 |
| heat shock protein family B (small) member 1                                   | Hspb1     | -0.783 |



|                                                                                                   |              |        |
|---------------------------------------------------------------------------------------------------|--------------|--------|
| SWI/SNF related, matrix associated, actin dependent regulator of chromatin, subfamily d, member 2 | Smarcd2      | -0.804 |
| keratin 5                                                                                         | Krt5         | -0.805 |
| tropomyosin 2, beta                                                                               | Tpm2         | -0.808 |
| CDC42 effector protein 1                                                                          | Cdc42ep1     | -0.809 |
| collagen type I alpha 1 chain                                                                     | Col1a1       | -0.813 |
| hyaluronan and proteoglycan link protein 1                                                        | Hapln1       | -0.813 |
| mitochondrial carrier 1                                                                           | Mtch1        | -0.814 |
| EGF containing fibulin like extracellular matrix protein 1                                        | Efemp1       | -0.821 |
| ARP1 actin-related protein 1 homolog B, centractin beta                                           | Actr1b       | -0.834 |
| asporin                                                                                           | Aspn         | -0.836 |
| lysyl oxidase                                                                                     | Lox          | -0.853 |
| tropomyosin 1, alpha                                                                              | Tpm1         | -0.856 |
| purine rich element binding protein B                                                             | Purb         | -0.857 |
| G protein pathway suppressor 1                                                                    | Gps1         | -0.862 |
| ferritin heavy chain 1                                                                            | Fth1         | -0.873 |
| decorin                                                                                           | Dcn          | -0.88  |
| microtubule associated protein 1A                                                                 | Map1a        | -0.886 |
| microfibril-associated glycoprotein 4-like                                                        | LOC102553715 | -0.888 |
| procollagen C-endopeptidase enhancer                                                              | Pcolce       | -0.923 |
| diaphanous related formin 1                                                                       | Diaph1       | -0.937 |
| glial fibrillary acidic protein                                                                   | Gfap         | -0.939 |
| alkaline phosphatase, liver/bone/kidney                                                           | Alpl         | -0.946 |
| interleukin enhancer binding factor 2                                                             | Ilf2         | -0.994 |
| charged multivesicular body protein 3                                                             | Chmp3        | -1.026 |
| mast cell protease 1                                                                              | Mcpt1        | -1.044 |
| PCI domain containing 2                                                                           | Pcid2        | -1.052 |
| keratin 10                                                                                        | Krt10        | -1.077 |
| secreted phosphoprotein 2                                                                         | Spp2         | -1.078 |
| tumor protein D52 like 2                                                                          | Tpd52l2      | -1.143 |
| myelin protein zero                                                                               | Mpz          | -1.47  |
| LUC7 like 2, pre-mRNA splicing factor                                                             | Luc7l2       | -1.613 |

**Table S7: Biochemical parameters of CKD rats exposed to vehicle, indoxyl sulfate or p-cresyl sulfate for 4 days.**

| Biochemical parameter    |         | Day 0       | Day 4                        |
|--------------------------|---------|-------------|------------------------------|
| Serum creatinine (mg/dl) | Vehicle | 0.32 ± 0.02 | 1.46 ± 0.24                  |
|                          | IS      | 0.31 ± 0.03 | 1.51 ± 0.21                  |
|                          | PCS     | 0.31 ± 0.01 | 1.56 ± 0.01                  |
| Serum IS (μM)            | Vehicle | 4.67 ± 0.54 | 35.98 ± 9.32                 |
|                          | IS      | 2.59 ± 0.72 | 316.84 ± 132.80 <sup>a</sup> |
|                          | PCS     | 2.84 ± 0.64 | 65.16 ± 31.99                |
| Serum PCS (μM)           | Vehicle | 0.09 ± 0.04 | 12.66 ± 6.61                 |
|                          | IS      | 0.10 ± 0.04 | 15.44 ± 9.34                 |
|                          | PCS     | 0.06 ± 0.02 | 205.12 ± 74.75 <sup>a</sup>  |

Data are presented as mean ± SEM. <sup>a</sup> P<0.05 versus vehicle.
